# Supplementary material
Source: PubMed Central journal article supplement (PMC5404348)
Supplement: NIHMS853458-supplement-1.pdf [file NIHMS853458-supplement-1.pdf]

supplemental Figure 1

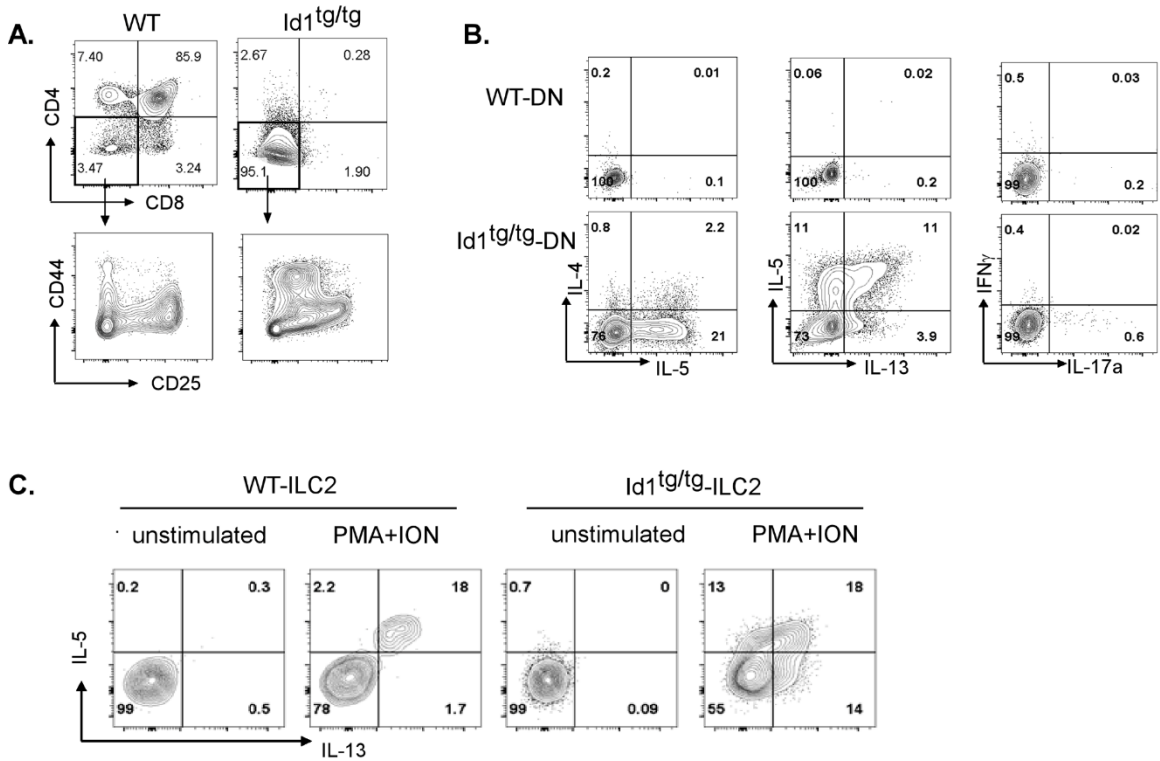

**Supplemental Figure 1. Id1 transgenic thymocytes are capable of producing type 2 cytokines.**

(A) The developmental profiles were determined by staining for CD4, CD8, CD44 and CD25 in thymocytes negative for B220, Mac-1, Gr-1, TCR $\gamma\delta$  and NK1.1. The CD4 and CD8 double negative subset was further analyzed for CD44 and CD25 expression. (B) Total thymocytes from WT and Id1<sup>tg/tg</sup> mice were stimulated with 500 ng/ml of ionomycin, 50 ng/ml PMA and monensin for 4 h. The CD4<sup>-</sup>CD8<sup>-</sup>B220<sup>-</sup>DX5<sup>-</sup> fraction was analyzed for the expression of indicated cytokines after intracellular staining with the Cytofix/Cytoperm Kit (BD Biosciences). (C) IL-5 and IL-13 production by thymic ILC2s (Lin<sup>-</sup>Thy1<sup>+</sup>ST2<sup>+</sup>) after stimulated as in (B). Data are representative of two independent experiments.

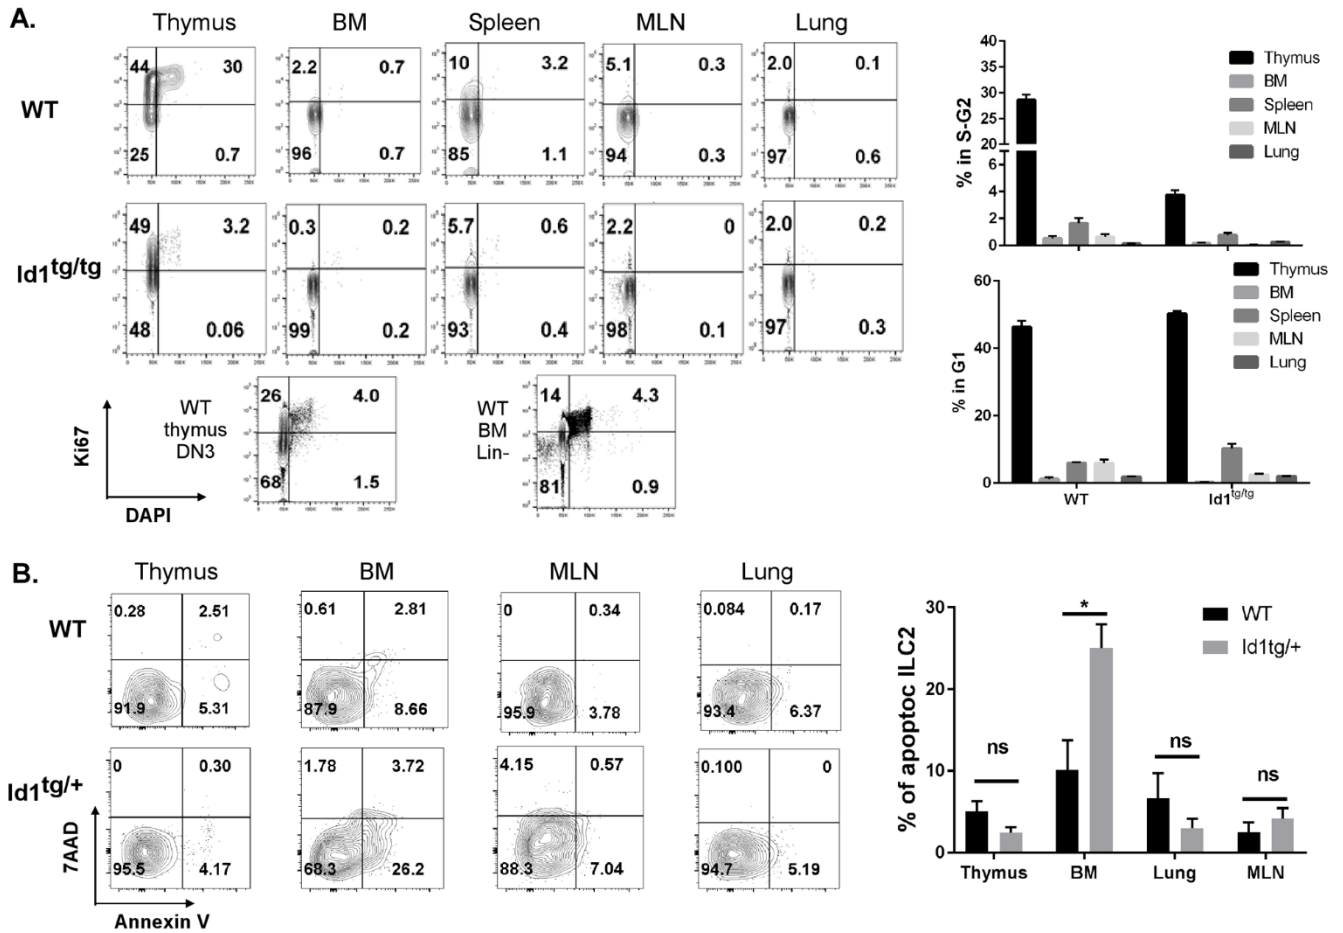

## Supplemental Figure 2. Augmented ILC2 counts in Id1 transgenic ILC2s are not due to increased proliferation or survival

(A) ILC2s in indicated tissues of WT and Id1<sup>tg/tg</sup> mice were stained intracellularly for Ki67 and DAPI along with antibodies described for Fig. 2B. Lin<sup>-</sup>Thy1<sup>+</sup>ST2<sup>+</sup> cells were gated to analyze Ki67 and DAPI fluorescence. Analyses of WT DN3 thymocytes and Lin<sup>-</sup> bone marrow cells served as controls for cycling cells. Numbers show the percentage in each quadrant. Ki67<sup>+</sup>DAPI<sup>+</sup> cells are considered to be in S-G2 phases of the cell cycle whereas Ki67<sup>+</sup>DAPI<sup>-</sup> mark cells in the G1 phase. Average percentages are shown in the bar graphs (n=3). Data are representative of two independent experiments. (B) ILC2s in indicated tissues of WT and Id1<sup>tg</sup> mice were stained with Annexin V and 7AAD along with antibodies described for Fig. 2B. Annexin-V<sup>+</sup>7AAD<sup>-</sup> cells are considered apoptotic. Average percentages are shown in the bar graphs (n=3 or 4). Data are representative of two independent experiments. \* < 0.05.

**Supplemental Table 1 Lists of genes shown in Fig. 3B**

| WT-ILC2 | Id1_M1  | Id1_M2  | Id1_T1 | Id1_T2 | ThyDN3 | ThyDN3 | Gene          |
|---------|---------|---------|--------|--------|--------|--------|---------------|
| -0.3056 | -0.3782 | -0.5911 | 0.2702 | 0.2795 | 0.3561 | 0.3690 | Pif1          |
| -0.2213 | -0.4805 | -0.5614 | 0.2685 | 0.3293 | 0.2943 | 0.3712 | Ska1          |
| -0.1881 | -0.5136 | -0.5501 | 0.2769 | 0.2783 | 0.3213 | 0.3753 | Troap         |
| -0.1922 | -0.5008 | -0.5597 | 0.2914 | 0.2741 | 0.3061 | 0.3811 | Top2a         |
| -0.1998 | -0.4994 | -0.5585 | 0.2916 | 0.2824 | 0.3349 | 0.3488 | Spag5         |
| -0.2062 | -0.4600 | -0.5823 | 0.2607 | 0.2340 | 0.3785 | 0.3752 | Clspn         |
| -0.2341 | -0.4727 | -0.5515 | 0.2639 | 0.2362 | 0.3307 | 0.4276 | Pbk           |
| -0.2313 | -0.4934 | -0.5340 | 0.2479 | 0.2538 | 0.3257 | 0.4312 | Ccna2         |
| -0.2439 | -0.5128 | -0.5114 | 0.2631 | 0.2593 | 0.3454 | 0.4003 | Shcbp1        |
| -0.2129 | -0.5258 | -0.5212 | 0.2941 | 0.2450 | 0.3493 | 0.3715 | Figl1         |
| -0.2754 | -0.5243 | -0.4853 | 0.3099 | 0.3284 | 0.3032 | 0.3436 | Neil3         |
| -0.2699 | -0.5448 | -0.4654 | 0.3334 | 0.3180 | 0.2703 | 0.3584 | Prr11         |
| -0.3132 | -0.5142 | -0.4639 | 0.3296 | 0.3137 | 0.2724 | 0.3756 | Rrm2          |
| -0.2893 | -0.4859 | -0.5050 | 0.2881 | 0.2884 | 0.2767 | 0.4270 | 2810417H13Rik |
| -0.2891 | -0.4471 | -0.5443 | 0.2949 | 0.2728 | 0.3075 | 0.4053 | Ncapg         |
| -0.3162 | -0.4733 | -0.4954 | 0.2654 | 0.2523 | 0.3497 | 0.4175 | Espl1         |
| -0.3098 | -0.4610 | -0.5123 | 0.2606 | 0.2570 | 0.3507 | 0.4149 | Ncaph         |
| -0.2808 | -0.4879 | -0.5129 | 0.2766 | 0.2791 | 0.3299 | 0.3960 | Kif4          |
| -0.2781 | -0.4628 | -0.5362 | 0.2665 | 0.2584 | 0.3610 | 0.3911 | Cdc6          |
| -0.3102 | -0.5282 | -0.4369 | 0.2339 | 0.2667 | 0.3240 | 0.4507 | Cdca3         |
| -0.3550 | -0.4569 | -0.4798 | 0.2721 | 0.3054 | 0.2773 | 0.4369 | Nusap1        |
| -0.4015 | -0.3673 | -0.5210 | 0.2521 | 0.2647 | 0.3810 | 0.3920 | Matn2         |
| -0.4072 | -0.3774 | -0.5131 | 0.2827 | 0.2977 | 0.3217 | 0.3956 | Kif18b        |
| -0.3821 | -0.4084 | -0.4988 | 0.2437 | 0.2611 | 0.3528 | 0.4317 | Cdca5         |
| -0.4204 | -0.3982 | -0.4755 | 0.2560 | 0.2646 | 0.3428 | 0.4307 | Cdk1          |
| -0.4484 | -0.4268 | -0.4301 | 0.3024 | 0.3005 | 0.3108 | 0.3917 | Ttk           |
| -0.4105 | -0.4413 | -0.4534 | 0.2988 | 0.2846 | 0.3456 | 0.3761 | Bub1          |
| -0.4348 | -0.4348 | -0.4348 | 0.2787 | 0.2927 | 0.3449 | 0.3881 | Hnf4a         |
| -0.4434 | -0.4345 | -0.4172 | 0.2491 | 0.2601 | 0.3615 | 0.4244 | Aurkb         |
| -0.4460 | -0.4314 | -0.4185 | 0.2466 | 0.2642 | 0.3705 | 0.4146 | Nek2          |
| -0.4222 | -0.4350 | -0.4437 | 0.2700 | 0.2687 | 0.3755 | 0.3867 | Cenpf         |
| -0.3983 | -0.4229 | -0.4771 | 0.2790 | 0.2552 | 0.3808 | 0.3833 | Mcoln3        |
| -0.3756 | -0.4789 | -0.4444 | 0.2815 | 0.2748 | 0.3438 | 0.3989 | Ckap2l        |
| -0.3962 | -0.4455 | -0.4538 | 0.2442 | 0.2916 | 0.3275 | 0.4321 | F630043A04Rik |
| -0.4088 | -0.4634 | -0.4341 | 0.3230 | 0.3456 | 0.2831 | 0.3546 | Gm11223       |
| -0.4381 | -0.4381 | -0.4308 | 0.3150 | 0.3706 | 0.2911 | 0.3304 | Tmem40        |
| -0.4020 | -0.4410 | -0.4643 | 0.3447 | 0.3399 | 0.3076 | 0.3151 | E2f7          |
| -0.4360 | -0.4360 | -0.4360 | 0.3521 | 0.3479 | 0.3067 | 0.3011 | 2010110K18Rik |
| -0.4361 | -0.4361 | -0.4361 | 0.3502 | 0.3315 | 0.2936 | 0.3329 | Gbx2          |

|         |         |         |        |        |        |        |               |
|---------|---------|---------|--------|--------|--------|--------|---------------|
| -0.4649 | -0.3619 | -0.4649 | 0.3257 | 0.3974 | 0.2102 | 0.3586 | Gm11832       |
| -0.1676 | -0.5985 | -0.4642 | 0.2356 | 0.2513 | 0.3321 | 0.4114 | Fam64a        |
| -0.1376 | -0.5519 | -0.5408 | 0.2702 | 0.2987 | 0.2918 | 0.3696 | Birc5         |
| -0.1482 | -0.5752 | -0.5094 | 0.3141 | 0.2840 | 0.2593 | 0.3756 | Hmmr          |
| -0.1681 | -0.5609 | -0.5150 | 0.3028 | 0.2725 | 0.2984 | 0.3702 | Casc5         |
| -0.1315 | -0.5322 | -0.5656 | 0.3044 | 0.2919 | 0.2904 | 0.3426 | Esco2         |
| -0.1448 | -0.5215 | -0.5683 | 0.3180 | 0.2988 | 0.2710 | 0.3468 | Cep55         |
| -0.0971 | -0.5368 | -0.5780 | 0.3117 | 0.2783 | 0.3233 | 0.2986 | Mki67         |
| -0.0735 | -0.5683 | -0.5571 | 0.2969 | 0.2752 | 0.2916 | 0.3352 | Cenpe         |
| -0.0876 | -0.4803 | -0.6226 | 0.2431 | 0.2546 | 0.2757 | 0.4172 | Ube2c         |
| -0.0741 | -0.5304 | -0.5900 | 0.2648 | 0.2580 | 0.2987 | 0.3730 | Kif11         |
| -0.0771 | -0.5115 | -0.6016 | 0.2390 | 0.2286 | 0.3583 | 0.3643 | Aspm          |
| -0.1474 | -0.5131 | -0.5733 | 0.2868 | 0.2592 | 0.3307 | 0.3571 | Stil          |
| -0.1323 | -0.4847 | -0.6068 | 0.2846 | 0.2606 | 0.3266 | 0.3519 | Sgol1         |
| -0.1253 | -0.5096 | -0.5818 | 0.2555 | 0.2387 | 0.3241 | 0.3985 | Kif15         |
| -0.1523 | -0.5065 | -0.5686 | 0.2458 | 0.2446 | 0.3178 | 0.4192 | Spc25         |
| -0.0520 | -0.5490 | -0.5663 | 0.1955 | 0.2062 | 0.3562 | 0.4094 | E2f2          |
| -0.0823 | -0.5393 | -0.5568 | 0.2099 | 0.1697 | 0.3851 | 0.4137 | Mcm10         |
| -0.0735 | -0.5758 | -0.5363 | 0.2283 | 0.2152 | 0.3436 | 0.3987 | Rad51         |
| -0.0324 | -0.5103 | -0.6084 | 0.2112 | 0.1753 | 0.3640 | 0.4007 | 5730590G19Rik |
| -0.1001 | -0.6459 | -0.4369 | 0.2340 | 0.2489 | 0.4505 | 0.2496 | Spns2         |
| 0.0303  | -0.6237 | -0.5361 | 0.2858 | 0.2586 | 0.2538 | 0.3313 | E2f8          |
| 0.0076  | -0.6112 | -0.5409 | 0.3219 | 0.2242 | 0.2770 | 0.3213 | Muc13         |
| 0.0064  | -0.6704 | -0.4729 | 0.2576 | 0.2507 | 0.3061 | 0.3224 | Mastl         |
| 0.0187  | -0.5805 | -0.5699 | 0.3047 | 0.3167 | 0.1696 | 0.3406 | Cenpk         |
| 0.0961  | -0.5543 | -0.6168 | 0.2145 | 0.2142 | 0.2893 | 0.3571 | BC030867      |
| 0.0865  | -0.5716 | -0.5995 | 0.2341 | 0.2117 | 0.2833 | 0.3555 | Kif14         |
| 0.0412  | -0.5131 | -0.6356 | 0.2269 | 0.1889 | 0.2982 | 0.3936 | Chek1         |
| 0.1273  | -0.5229 | -0.6453 | 0.2167 | 0.1581 | 0.3213 | 0.3447 | Kntc1         |
| 0.0903  | -0.5473 | -0.6099 | 0.1945 | 0.1541 | 0.3389 | 0.3794 | Dtl           |
| 0.1357  | -0.5893 | -0.5890 | 0.1970 | 0.2210 | 0.2645 | 0.3601 | Ccnb2         |
| 0.1502  | -0.5901 | -0.5836 | 0.1639 | 0.2330 | 0.2389 | 0.3878 | Cks1b         |
| -0.1212 | -0.3561 | -0.7056 | 0.2982 | 0.2539 | 0.3797 | 0.2512 | Gm17356       |
| -0.1692 | -0.5141 | -0.5560 | 0.3206 | 0.3399 | 0.3674 | 0.2113 | 2810442I21Rik |
| -0.2273 | -0.4942 | -0.4898 | 0.1660 | 0.1291 | 0.4440 | 0.4721 | Blk           |
| -0.1382 | -0.5490 | -0.4717 | 0.1161 | 0.1158 | 0.4491 | 0.4779 | Syt13         |
| -0.1577 | -0.5085 | -0.5085 | 0.1297 | 0.1420 | 0.5326 | 0.3705 | Gm11579       |
| -0.1279 | -0.6024 | -0.3610 | 0.0756 | 0.0328 | 0.4741 | 0.5088 | Tspan2        |
| 0.0603  | -0.5042 | -0.5769 | 0.0707 | 0.0546 | 0.4633 | 0.4321 | Gria3         |
| 0.0218  | -0.4642 | -0.5804 | 0.0658 | 0.0163 | 0.4610 | 0.4796 | Angptl2       |
| -0.1075 | -0.4121 | -0.6132 | 0.0789 | 0.1453 | 0.4881 | 0.4206 | Ddc           |

|         |         |         |        |        |        |        |               |
|---------|---------|---------|--------|--------|--------|--------|---------------|
| -0.5000 | -0.3690 | -0.3823 | 0.1867 | 0.1634 | 0.4489 | 0.4523 | Myb           |
| -0.4945 | -0.3576 | -0.3537 | 0.1350 | 0.0981 | 0.4593 | 0.5135 | Tmem121       |
| -0.4497 | -0.3240 | -0.4467 | 0.1563 | 0.1111 | 0.5098 | 0.4432 | Rab44         |
| -0.4465 | -0.3309 | -0.4465 | 0.1810 | 0.0945 | 0.4865 | 0.4619 | Ybx2          |
| -0.5344 | -0.2535 | -0.3969 | 0.1128 | 0.1034 | 0.4944 | 0.4741 | Endou         |
| -0.4078 | -0.4078 | -0.4078 | 0.1386 | 0.1179 | 0.4668 | 0.5001 | BC048355      |
| -0.4148 | -0.4148 | -0.4148 | 0.1752 | 0.1369 | 0.4688 | 0.4634 | Fads2         |
| -0.4151 | -0.4141 | -0.4276 | 0.1885 | 0.1616 | 0.4356 | 0.4712 | Gm5648        |
| -0.3557 | -0.4248 | -0.4762 | 0.1918 | 0.1697 | 0.4386 | 0.4565 | Uhrf1         |
| -0.3978 | -0.3967 | -0.4592 | 0.1831 | 0.1662 | 0.4118 | 0.4927 | Clec12a       |
| -0.4224 | -0.4224 | -0.4224 | 0.2356 | 0.1561 | 0.4680 | 0.4073 | Prtg          |
| -0.5003 | -0.5003 | -0.2836 | 0.3049 | 0.2649 | 0.3395 | 0.3749 | Pcyt1b        |
| -0.4674 | -0.4674 | -0.3456 | 0.2366 | 0.2206 | 0.4135 | 0.4098 | Dmwd          |
| -0.4741 | -0.4741 | -0.2877 | 0.1942 | 0.1343 | 0.4627 | 0.4447 | Gm10384       |
| -0.4791 | -0.3316 | -0.4735 | 0.2399 | 0.2900 | 0.4484 | 0.3059 | S1pr3         |
| -0.4617 | -0.4617 | -0.3629 | 0.2563 | 0.2931 | 0.4657 | 0.2711 | Hist1h2bj     |
| -0.5674 | -0.3239 | -0.3847 | 0.2465 | 0.2712 | 0.3387 | 0.4196 | 2010317E24Rik |
| -0.5860 | -0.3110 | -0.3796 | 0.3025 | 0.2732 | 0.3052 | 0.3957 | Lrr1          |
| -0.5081 | -0.3729 | -0.4204 | 0.3053 | 0.3008 | 0.3306 | 0.3648 | Nuf2          |
| -0.5062 | -0.2702 | -0.5006 | 0.2597 | 0.2887 | 0.3200 | 0.4086 | Gm6091        |
| -0.5798 | -0.3402 | -0.3628 | 0.3366 | 0.3532 | 0.2604 | 0.3326 | Depdc1b       |
| -0.5753 | -0.2940 | -0.4131 | 0.3058 | 0.3222 | 0.3093 | 0.3449 | Uchl1         |
| -0.5160 | -0.3209 | -0.4390 | 0.2676 | 0.2009 | 0.3905 | 0.4167 | I830077J02Rik |
| -0.5482 | -0.2728 | -0.4317 | 0.2361 | 0.1788 | 0.4113 | 0.4264 | Bcl11a        |
| -0.5194 | -0.3658 | -0.3982 | 0.2443 | 0.2402 | 0.3732 | 0.4257 | 2610002D18Rik |
| -0.5415 | -0.3696 | -0.3592 | 0.2210 | 0.2266 | 0.3756 | 0.4471 | Spc24         |
| -0.6024 | -0.3054 | -0.3281 | 0.2116 | 0.1749 | 0.4259 | 0.4235 | Ephb2         |
| -0.6327 | -0.2640 | -0.3338 | 0.1966 | 0.2320 | 0.3530 | 0.4488 | Cenpm         |
| -0.6372 | -0.3824 | -0.2225 | 0.2569 | 0.2568 | 0.3431 | 0.3853 | Iqgap3        |
| -0.6288 | -0.3266 | -0.3096 | 0.3102 | 0.2889 | 0.3139 | 0.3520 | Neur1b        |
| -0.6217 | -0.3388 | -0.3027 | 0.2660 | 0.2903 | 0.3203 | 0.3866 | Mxd3          |
| -0.6207 | -0.3159 | -0.3274 | 0.2773 | 0.2798 | 0.3168 | 0.3901 | Cdc25c        |
| -0.6207 | -0.3692 | -0.2713 | 0.2948 | 0.3022 | 0.2777 | 0.3865 | Ccnb1         |
| -0.6620 | -0.3406 | -0.2403 | 0.3389 | 0.3066 | 0.2801 | 0.3173 | Slc45a3       |
| -0.5957 | -0.3771 | -0.2898 | 0.3335 | 0.2002 | 0.3959 | 0.3330 | Olf1r524      |
| -0.6899 | -0.2253 | -0.3057 | 0.2598 | 0.2810 | 0.3081 | 0.3721 | Kif2c         |
| -0.6640 | -0.2321 | -0.3418 | 0.2717 | 0.2821 | 0.3647 | 0.3194 | Ankle1        |
| -0.7441 | -0.2249 | -0.2056 | 0.2465 | 0.2543 | 0.3130 | 0.3608 | Ccnf          |
| -0.7375 | -0.1942 | -0.2514 | 0.2755 | 0.2490 | 0.3149 | 0.3437 | Rad51ap1      |
| -0.5645 | -0.3398 | -0.2892 | 0.1295 | 0.1123 | 0.4724 | 0.4793 | Gpr56         |
| -0.5917 | -0.3222 | -0.2729 | 0.1307 | 0.1170 | 0.4741 | 0.4649 | Epb4.1l4b     |

|         |         |         |         |         |        |        |               |
|---------|---------|---------|---------|---------|--------|--------|---------------|
| -0.5700 | -0.3373 | -0.2381 | 0.0947  | 0.0584  | 0.4963 | 0.4960 | Evpl          |
| -0.6988 | -0.2059 | -0.1603 | 0.0856  | 0.0478  | 0.4715 | 0.4601 | Actn1         |
| -0.3153 | -0.1014 | -0.1169 | -0.3153 | -0.3153 | 0.5891 | 0.5751 | Scn4b         |
| -0.3752 | -0.0373 | -0.0015 | -0.3174 | -0.3752 | 0.5979 | 0.5088 | Lipg          |
| -0.1259 | -0.0928 | -0.0966 | -0.3810 | -0.4307 | 0.5778 | 0.5492 | Spib          |
| -0.0991 | -0.2678 | -0.2331 | -0.3214 | -0.2564 | 0.6144 | 0.5635 | Xist          |
| -0.0852 | -0.2732 | -0.2732 | -0.2732 | -0.2732 | 0.6042 | 0.5737 | Fam163b       |
| -0.2373 | -0.2373 | -0.2373 | -0.2373 | -0.2373 | 0.6782 | 0.5083 | Gm14236       |
| -0.2637 | -0.2637 | -0.2637 | -0.1265 | -0.2637 | 0.6533 | 0.5282 | Vwce          |
| -0.2548 | -0.1727 | -0.2548 | -0.2548 | -0.2548 | 0.5796 | 0.6121 | Hmgcs2        |
| -0.2390 | -0.2390 | -0.2390 | -0.2390 | -0.2390 | 0.5910 | 0.6041 | Spats2        |
| -0.2390 | -0.2390 | -0.2390 | -0.2390 | -0.2390 | 0.6118 | 0.5832 | Camkv         |
| -0.2390 | -0.2390 | -0.2390 | -0.2390 | -0.2390 | 0.6113 | 0.5837 | Fbln2         |
| -0.2390 | -0.2390 | -0.2390 | -0.2390 | -0.2390 | 0.6106 | 0.5844 | A930002I21Rik |
| -0.2396 | -0.2396 | -0.2368 | -0.2396 | -0.2396 | 0.5983 | 0.5969 | Ptcra         |
| -0.2390 | -0.2390 | -0.2390 | -0.2390 | -0.2390 | 0.6053 | 0.5898 | Gm525         |
| -0.2396 | -0.2396 | -0.2396 | -0.2396 | -0.2367 | 0.6030 | 0.5922 | Myzap         |
| -0.2088 | -0.2443 | -0.2141 | -0.2410 | -0.2844 | 0.6133 | 0.5795 | Notch3        |
| -0.2387 | -0.2387 | -0.2387 | -0.2387 | -0.2387 | 0.6337 | 0.5599 | Slc5a9        |
| -0.2385 | -0.2385 | -0.2385 | -0.2385 | -0.2385 | 0.6427 | 0.5500 | Adamtsl2      |
| -0.2389 | -0.2389 | -0.2389 | -0.2389 | -0.2389 | 0.6222 | 0.5723 | Odz1          |
| -0.2389 | -0.2389 | -0.2389 | -0.2389 | -0.2389 | 0.6240 | 0.5704 | Rtkn          |
| -0.2388 | -0.2388 | -0.2388 | -0.2388 | -0.2388 | 0.6269 | 0.5673 | Kcnh3         |
| -0.2388 | -0.2388 | -0.2388 | -0.2388 | -0.2388 | 0.6261 | 0.5682 | Cldn4         |
| -0.2888 | -0.1540 | -0.2888 | -0.1624 | -0.2888 | 0.5985 | 0.5843 | Tdrd5         |
| -0.2630 | -0.2630 | -0.1796 | -0.2231 | -0.2630 | 0.6097 | 0.5820 | Uaca          |
| -0.2567 | -0.2567 | -0.1671 | -0.2567 | -0.2541 | 0.5868 | 0.6045 | 2010001M09Rik |
| -0.3069 | -0.2515 | -0.0951 | -0.2195 | -0.3041 | 0.5969 | 0.5801 | Mst1r         |
| -0.3840 | -0.1931 | -0.2408 | -0.1534 | -0.2048 | 0.5964 | 0.5797 | Bst1          |
| -0.4229 | -0.2042 | -0.1157 | -0.1831 | -0.2371 | 0.5742 | 0.5887 | Tmem151b      |
| -0.3094 | -0.3094 | -0.3094 | -0.0778 | -0.1603 | 0.6025 | 0.5639 | Rag1          |
| -0.3078 | -0.3078 | -0.3078 | -0.0501 | -0.1894 | 0.6087 | 0.5540 | H19           |
| -0.2926 | -0.2926 | -0.2926 | -0.0836 | -0.2134 | 0.6029 | 0.5719 | Mpzl2         |
| -0.2947 | -0.2947 | -0.2910 | -0.0534 | -0.2353 | 0.5853 | 0.5838 | Lhfpl2        |
| -0.3058 | -0.3058 | -0.3058 | -0.0474 | -0.1992 | 0.5699 | 0.5940 | Trbv5         |
| -0.3401 | -0.3401 | -0.2775 | -0.0784 | -0.1220 | 0.5722 | 0.5858 | Dntt          |
| -0.3522 | -0.3522 | -0.2640 | -0.0407 | -0.1407 | 0.5774 | 0.5723 | Slc16a5       |
| -0.3290 | -0.3290 | -0.3290 | -0.0389 | -0.1219 | 0.5754 | 0.5725 | Elfn2         |
| -0.3241 | -0.3241 | -0.3241 | -0.0387 | -0.1407 | 0.5874 | 0.5644 | 1810059H22Rik |
| -0.3216 | -0.3216 | -0.3216 | -0.0322 | -0.1558 | 0.5774 | 0.5754 | C1qtnf1       |
| -0.4104 | -0.2156 | -0.3280 | -0.0962 | -0.0977 | 0.5787 | 0.5691 | Gfra1         |

|         |         |         |         |         |         |         |               |
|---------|---------|---------|---------|---------|---------|---------|---------------|
| -0.3235 | -0.2539 | -0.3235 | -0.1131 | -0.1585 | 0.5661  | 0.6065  | Ly6d          |
| -0.3092 | -0.3092 | -0.3092 | -0.1265 | -0.1152 | 0.5920  | 0.5774  | Gm5111        |
| -0.3008 | -0.3008 | -0.2968 | -0.1452 | -0.1329 | 0.5853  | 0.5913  | Cpne5         |
| -0.3110 | -0.2520 | -0.3071 | -0.1356 | -0.1730 | 0.6253  | 0.5533  | Col15a1       |
| -0.2695 | -0.2695 | -0.2664 | -0.2695 | -0.1048 | 0.6356  | 0.5442  | Gm12503       |
| -0.2675 | -0.2675 | -0.2640 | -0.2209 | -0.1707 | 0.6098  | 0.5809  | Pgpep1l       |
| -0.3986 | -0.2856 | -0.1840 | -0.1741 | -0.1236 | 0.5988  | 0.5671  | A930013B10Rik |
| -0.3444 | -0.3444 | -0.2051 | -0.2180 | -0.0436 | 0.6215  | 0.5340  | Chrna9        |
| -0.5428 | -0.2115 | -0.1507 | -0.1166 | -0.0877 | 0.5807  | 0.5286  | Pld4          |
| -0.4982 | -0.2104 | -0.1387 | -0.1146 | -0.1729 | 0.5923  | 0.5426  | Adamts17      |
| -0.3869 | -0.2919 | -0.3419 | -0.0421 | -0.0697 | 0.5784  | 0.5541  | Ptprf         |
| -0.3454 | -0.3454 | -0.3454 | -0.0383 | -0.0544 | 0.5762  | 0.5528  | Rag2          |
| -0.3527 | -0.3527 | -0.3527 | -0.0008 | -0.0578 | 0.5566  | 0.5601  | Ptk7          |
| -0.3580 | -0.3580 | -0.3543 | 0.0152  | -0.0533 | 0.5335  | 0.5748  | Tubb3         |
| -0.4397 | -0.2966 | -0.3164 | -0.0052 | -0.0519 | 0.5561  | 0.5537  | Sox13         |
| -0.3539 | -0.3539 | -0.3501 | -0.0696 | 0.0168  | 0.5052  | 0.6055  | Id3           |
| -0.3907 | -0.3907 | -0.3907 | 0.0886  | 0.0524  | 0.5182  | 0.5127  | Prss57        |
| -0.3922 | -0.3922 | -0.3888 | 0.0878  | 0.0553  | 0.5140  | 0.5160  | Slc43a1       |
| -0.3747 | -0.3747 | -0.3747 | 0.0209  | 0.0283  | 0.5397  | 0.5351  | Sstr2         |
| 0.5291  | -0.4272 | -0.1444 | 0.3699  | 0.3601  | -0.2604 | -0.4272 | Stc2          |
| 0.5843  | -0.3636 | -0.3636 | 0.2930  | 0.3836  | -0.1702 | -0.3636 | Igfbp7        |
| 0.5443  | -0.3337 | -0.1910 | 0.3400  | 0.3931  | -0.4126 | -0.3400 | Ccr6          |
| 0.6636  | -0.2962 | -0.1486 | 0.2887  | 0.2617  | -0.4169 | -0.3523 | Sox8          |
| 0.6106  | -0.2929 | -0.1487 | 0.2863  | 0.3437  | -0.3995 | -0.3995 | 2810468N07Rik |
| 0.7032  | -0.4078 | -0.3203 | 0.2444  | 0.2440  | -0.1607 | -0.3027 | Il1r1         |
| 0.7206  | -0.3818 | -0.3818 | 0.2452  | 0.2090  | -0.2269 | -0.1844 | Mapk10        |
| 0.7577  | -0.3470 | -0.3419 | 0.1918  | 0.2021  | -0.1867 | -0.2760 | Scrt1         |
| 0.7394  | -0.3305 | -0.3900 | 0.2153  | 0.2125  | -0.2028 | -0.2438 | Abi3bp        |
| 0.7398  | -0.2968 | -0.2968 | 0.2094  | 0.2378  | -0.2968 | -0.2968 | 1700006J14Rik |
| 0.6935  | -0.3081 | -0.3017 | 0.2941  | 0.2384  | -0.3081 | -0.3081 | Tdrd9         |
| 0.7914  | -0.1657 | -0.2684 | 0.1662  | 0.1472  | -0.3354 | -0.3354 | Fzd4          |
| 0.7945  | -0.1855 | -0.3042 | 0.1882  | 0.1248  | -0.3089 | -0.3089 | Irg1          |
| 0.7980  | -0.3179 | -0.2098 | 0.1568  | 0.1533  | -0.3179 | -0.2625 | Kcnk1         |
| 0.8159  | -0.2733 | -0.2679 | 0.1080  | 0.1639  | -0.2733 | -0.2733 | Smarca1       |
| 0.7796  | -0.2703 | -0.1801 | 0.1675  | 0.1774  | -0.3371 | -0.3371 | Il23r         |
| 0.7952  | -0.2132 | -0.1423 | 0.1343  | 0.1476  | -0.3907 | -0.3309 | Plekhg1       |
| 0.7334  | -0.2451 | -0.1614 | 0.2167  | 0.2109  | -0.3772 | -0.3772 | Upp1          |
| 0.7708  | -0.4411 | -0.3643 | 0.0905  | 0.0243  | -0.2224 | 0.1423  | Hspa1a        |
| 0.7373  | -0.4203 | -0.4963 | 0.1664  | 0.0393  | 0.0308  | -0.0573 | Lingo4        |
| 0.7428  | -0.4871 | -0.2879 | 0.1845  | 0.1890  | -0.1644 | -0.1769 | Mc5r          |
| 0.6922  | -0.4070 | -0.4683 | 0.2789  | 0.1588  | -0.1444 | -0.1101 | Sdc1          |

|         |         |         |         |         |         |         |               |
|---------|---------|---------|---------|---------|---------|---------|---------------|
| 0.6346  | -0.5840 | -0.4039 | 0.2346  | 0.1864  | -0.0567 | -0.0110 | Tox2          |
| 0.8992  | -0.2280 | -0.1693 | -0.2280 | -0.2251 | 0.0347  | -0.0836 | Gm17056       |
| 0.9062  | -0.2188 | -0.2219 | -0.1986 | -0.1934 | -0.0040 | -0.0694 | Fosb          |
| 0.9074  | -0.2091 | -0.2043 | -0.2091 | -0.2091 | -0.0586 | -0.0173 | 4930532G15Rik |
| 0.9186  | -0.1866 | -0.1823 | -0.1866 | -0.1866 | -0.0503 | -0.1263 | 9630028B13Rik |
| 0.9188  | -0.1756 | -0.1756 | -0.1756 | -0.1756 | -0.0411 | -0.1756 | Hs6st2        |
| 0.9079  | -0.2479 | -0.0420 | -0.2479 | -0.1793 | -0.1138 | -0.0770 | Slc24a1       |
| 0.8668  | -0.3352 | -0.2789 | -0.1856 | -0.1445 | 0.0285  | 0.0488  | mt-Rnr2       |
| 0.8854  | -0.2661 | -0.2621 | -0.0360 | -0.0475 | -0.0035 | -0.2702 | Ptgs2         |
| 0.9042  | -0.2840 | -0.1250 | -0.1775 | -0.0692 | -0.0266 | -0.2218 | Snord118      |
| 0.8702  | -0.0280 | -0.1182 | -0.2709 | -0.2709 | 0.0888  | -0.2709 | SNORA17       |
| 0.9197  | -0.0485 | -0.1742 | -0.1742 | -0.1742 | -0.1742 | -0.1742 | Cxcl2         |
| 0.9233  | -0.1674 | -0.1674 | -0.0862 | -0.1674 | -0.1674 | -0.1674 | Il22          |
| 0.9258  | -0.1543 | -0.1543 | -0.1543 | -0.1543 | -0.1543 | -0.1543 | Cxcl1         |
| 0.9258  | -0.1543 | -0.1543 | -0.1543 | -0.1543 | -0.1543 | -0.1543 | Gm12473       |
| 0.9258  | -0.1549 | -0.1549 | -0.1549 | -0.1515 | -0.1549 | -0.1549 | Zmat4         |
| 0.8875  | -0.0428 | -0.0760 | -0.0585 | -0.0880 | -0.3111 | -0.3111 | Atf3          |
| 0.9009  | -0.1349 | -0.0976 | -0.1104 | -0.0389 | -0.3375 | -0.1817 | Gjb2          |
| 0.3797  | -0.4122 | -0.6332 | -0.0105 | -0.0713 | 0.3582  | 0.3893  | Ctla4         |
| 0.1692  | -0.4067 | -0.7403 | 0.1984  | 0.1950  | 0.2224  | 0.3619  | Cdkn3         |
| 0.1983  | -0.3574 | -0.7457 | 0.2280  | 0.0072  | 0.3161  | 0.3535  | Pou2af1       |
| 0.3883  | -0.6554 | -0.5042 | 0.1939  | 0.1216  | 0.1596  | 0.2961  | Gm5465        |
| 0.4797  | -0.6083 | -0.5234 | 0.1264  | 0.1183  | 0.1233  | 0.2841  | Gas2l3        |
| 0.4328  | -0.5301 | -0.6259 | 0.2576  | 0.1858  | 0.1428  | 0.1370  | Auts2         |
| 0.3358  | -0.5227 | -0.6562 | 0.2499  | 0.1894  | 0.2439  | 0.1599  | Tacstd2       |
| 0.5866  | -0.6068 | -0.4216 | -0.0256 | -0.0001 | 0.2375  | 0.2300  | Dock1         |
| 0.5246  | -0.6072 | -0.4898 | 0.0515  | 0.1915  | 0.2711  | 0.0583  | Rnf150        |
| 0.5745  | -0.5802 | -0.4791 | 0.0619  | 0.0509  | 0.3044  | 0.0677  | Gls2          |
| 0.4332  | -0.3232 | -0.3232 | -0.3232 | -0.3232 | 0.5418  | 0.3177  | Gm12913       |
| 0.4375  | -0.3265 | -0.3265 | -0.3265 | -0.3265 | 0.4855  | 0.3829  | mt-Tl1        |
| 0.3568  | -0.3308 | -0.2693 | -0.4427 | -0.2308 | 0.5614  | 0.3554  | Mir5115       |
| 0.4883  | -0.2533 | -0.2486 | -0.4109 | -0.3547 | 0.5264  | 0.2528  | Mir5109       |
| 0.5765  | -0.3228 | -0.3228 | -0.3228 | -0.3194 | 0.3587  | 0.3527  | Gm5263        |
| 0.7845  | -0.2834 | -0.2834 | -0.2834 | -0.2800 | 0.1205  | 0.2253  | Gm7618        |
| 0.7407  | -0.2829 | -0.2294 | -0.4038 | -0.2528 | 0.2092  | 0.2191  | Gm12420       |
| 0.0044  | -0.4524 | -0.4524 | 0.5456  | 0.5202  | -0.0164 | -0.1490 | Svep1         |
| 0.3101  | -0.4581 | -0.4581 | 0.4447  | 0.3541  | 0.1705  | -0.3632 | Cacna1e       |
| 0.4055  | -0.5457 | -0.5457 | 0.3261  | 0.3539  | -0.0617 | 0.0677  | Grb10         |
| 0.1249  | -0.4878 | -0.6175 | 0.4901  | 0.3068  | 0.0082  | 0.1754  | Lrrc66        |
| 0.3621  | -0.2443 | -0.7250 | 0.4612  | 0.2500  | -0.0134 | -0.0907 | Sprn          |
| -0.1141 | -0.6483 | -0.3389 | 0.4344  | 0.4362  | -0.0367 | 0.2675  | Depdc1a       |



|         |         |         |        |        |         |         |           |
|---------|---------|---------|--------|--------|---------|---------|-----------|
| 0.0325  | -0.4609 | -0.3282 | 0.4806 | 0.5318 | -0.3851 | 0.1293  | Hhex      |
| -0.3659 | -0.3659 | -0.3659 | 0.6079 | 0.4333 | -0.1121 | 0.1687  | Gm16194   |
| -0.4179 | -0.2851 | -0.4179 | 0.5290 | 0.3839 | -0.1416 | 0.3495  | 42257     |
| -0.3176 | -0.3176 | -0.3176 | 0.4964 | 0.5460 | -0.3176 | 0.2279  | Olfir523  |
| -0.3358 | -0.3358 | -0.2540 | 0.6018 | 0.5593 | -0.1778 | -0.0576 | Clec4e    |
| -0.3170 | -0.3170 | -0.3170 | 0.6237 | 0.5353 | -0.1297 | -0.0784 | Cldn2     |
| -0.4244 | -0.2093 | -0.2944 | 0.5854 | 0.5669 | -0.1216 | -0.1025 | Gm8113    |
| -0.2395 | -0.2395 | -0.2327 | 0.5336 | 0.6570 | -0.2395 | -0.2395 | Syt6      |
| -0.2607 | -0.2607 | -0.2607 | 0.5147 | 0.6664 | -0.2607 | -0.1383 | Siglec5   |
| -0.2626 | -0.2626 | -0.2626 | 0.5026 | 0.6748 | -0.2626 | -0.1269 | Prss16    |
| -0.2864 | -0.1069 | -0.2864 | 0.6078 | 0.5722 | -0.2864 | -0.2138 | Cd34      |
| -0.2750 | -0.0824 | -0.2676 | 0.6353 | 0.5396 | -0.2750 | -0.2750 | Gcm2      |
| -0.2388 | -0.2388 | -0.2388 | 0.6292 | 0.5648 | -0.2388 | -0.2388 | Fgf3      |
| -0.2390 | -0.2390 | -0.2390 | 0.6055 | 0.5897 | -0.2390 | -0.2390 | Ripply1   |
| -0.2390 | -0.2390 | -0.2390 | 0.6109 | 0.5841 | -0.2390 | -0.2390 | Sema3c    |
| -0.2405 | -0.2405 | -0.2327 | 0.6154 | 0.5794 | -0.2405 | -0.2405 | Gm15947   |
| -0.2390 | -0.2390 | -0.2390 | 0.6170 | 0.5778 | -0.2390 | -0.2390 | Aox1      |
| -0.2383 | -0.2383 | -0.2383 | 0.6512 | 0.5404 | -0.2383 | -0.2383 | Ahsg      |
| -0.2378 | -0.2378 | -0.2378 | 0.6669 | 0.5221 | -0.2378 | -0.2378 | Ctsg      |
| -0.2374 | -0.2374 | -0.2374 | 0.6769 | 0.5100 | -0.2374 | -0.2374 | Caly      |
| -0.2370 | -0.2370 | -0.2370 | 0.6856 | 0.4993 | -0.2370 | -0.2370 | Trav14n-3 |
| -0.4078 | -0.2114 | -0.4078 | 0.5766 | 0.5277 | 0.0277  | -0.1048 | Slc35d3   |
| -0.3127 | -0.3127 | -0.3127 | 0.7026 | 0.4252 | -0.0106 | -0.1790 | Gm11692   |
| -0.2947 | 0.0418  | -0.2947 | 0.5194 | 0.6174 | -0.2947 | -0.2947 | Adamts2   |
| -0.3427 | -0.0422 | -0.3340 | 0.6328 | 0.4968 | -0.0680 | -0.3427 | Stbd1     |
| -0.1874 | 0.0497  | 0.0613  | 0.5145 | 0.5020 | -0.4657 | -0.4745 | Lgals3    |
| -0.1692 | 0.0488  | 0.1016  | 0.4936 | 0.4949 | -0.4849 | -0.4849 | Cx3cr1    |
| -0.4426 | 0.1036  | -0.0047 | 0.5512 | 0.4822 | -0.4426 | -0.2470 | Parm1     |
| -0.3073 | -0.1526 | -0.0954 | 0.5933 | 0.5765 | -0.3073 | -0.3073 | Fam179a   |
| -0.3610 | -0.0549 | -0.0382 | 0.5586 | 0.5653 | -0.4033 | -0.2665 | Igfbp4    |
| -0.3546 | -0.1209 | 0.0893  | 0.5521 | 0.5434 | -0.3546 | -0.3546 | Mmp27     |
| -0.3696 | -0.0382 | 0.0665  | 0.5516 | 0.5291 | -0.3696 | -0.3696 | Lama3     |
| -0.3843 | 0.0233  | 0.0813  | 0.5095 | 0.5387 | -0.3843 | -0.3843 | Abhd12b   |
| -0.4266 | -0.4266 | -0.4196 | 0.4613 | 0.3860 | 0.2748  | 0.1507  | Morc4     |
| -0.5206 | -0.3192 | -0.4411 | 0.4082 | 0.3801 | 0.2528  | 0.2398  | Gm15428   |
| -0.4316 | -0.4316 | -0.4316 | 0.4083 | 0.3834 | 0.2720  | 0.2312  | Il31ra    |
| -0.4410 | -0.4082 | -0.4517 | 0.3726 | 0.3807 | 0.2978  | 0.2499  | Cd163l1   |
| -0.4478 | -0.4107 | -0.4324 | 0.3815 | 0.4195 | 0.2122  | 0.2778  | Lgals1    |
| -0.4333 | -0.4333 | -0.4333 | 0.3660 | 0.3908 | 0.2371  | 0.3061  | Gm2788    |
| -0.6235 | -0.3308 | -0.2922 | 0.3943 | 0.3676 | 0.3074  | 0.1771  | Kif5a     |
| -0.4849 | -0.3835 | -0.3756 | 0.3990 | 0.4748 | 0.0767  | 0.2935  | Gm12856   |

|         |         |         |        |        |         |         |               |
|---------|---------|---------|--------|--------|---------|---------|---------------|
| -0.5218 | -0.4174 | -0.2762 | 0.5154 | 0.3470 | 0.0564  | 0.2966  | Mdga1         |
| -0.4592 | -0.4132 | -0.3421 | 0.4643 | 0.4916 | 0.0563  | 0.2023  | Stmn1         |
| -0.4455 | -0.4455 | -0.3009 | 0.5377 | 0.4457 | 0.0660  | 0.1426  | Odz4          |
| -0.4621 | -0.4621 | -0.1797 | 0.5237 | 0.5068 | 0.0950  | -0.0216 | E030002O03Rik |
| -0.4422 | -0.3288 | -0.2869 | 0.5780 | 0.5253 | 0.0156  | -0.0609 | Slc15a1       |
| -0.4824 | -0.3692 | -0.2162 | 0.5454 | 0.5274 | 0.0631  | -0.0680 | Slc17a8       |
| -0.6279 | -0.3401 | -0.0579 | 0.5022 | 0.4799 | 0.0628  | -0.0189 | Sox5          |
| -0.6532 | -0.2605 | -0.2083 | 0.4730 | 0.4701 | 0.1142  | 0.0647  | Gm5593        |
| -0.7603 | -0.1472 | -0.1546 | 0.4273 | 0.4106 | 0.1090  | 0.1152  | Tgfb3         |
| -0.6027 | -0.2326 | -0.3502 | 0.4366 | 0.4586 | 0.2372  | 0.0531  | Lyl1          |
| -0.6737 | -0.1559 | -0.2654 | 0.4761 | 0.4329 | 0.1930  | -0.0069 | Tas1r1        |
| -0.8596 | 0.0915  | 0.1164  | 0.3349 | 0.3412 | -0.0839 | 0.0595  | Cpa3          |
| -0.7068 | 0.0370  | 0.0970  | 0.4630 | 0.4557 | -0.2355 | -0.1104 | Emilin2       |
| -0.9115 | 0.0552  | 0.0739  | 0.1644 | 0.1555 | 0.2671  | 0.1953  | Adcy6         |
| -0.8876 | -0.0173 | -0.0131 | 0.2333 | 0.2504 | 0.2067  | 0.2276  | 5830411N06Rik |
| -0.9076 | 0.0272  | 0.0601  | 0.2281 | 0.2336 | 0.1572  | 0.2014  | Sell          |
| -0.8855 | -0.0028 | 0.0287  | 0.3039 | 0.2962 | 0.1034  | 0.1559  | Slc22a3       |
| 0.6935  | -0.1365 | -0.0843 | 0.2182 | 0.2068 | -0.4514 | -0.4463 | Fosl2         |
| 0.6026  | -0.1774 | -0.1227 | 0.3154 | 0.2847 | -0.4158 | -0.4868 | Hey1          |
| 0.6050  | -0.1310 | -0.0770 | 0.3040 | 0.2526 | -0.4768 | -0.4768 | Tns4          |
| 0.5129  | -0.1126 | -0.0500 | 0.3185 | 0.3376 | -0.5032 | -0.5032 | Rhod          |
| 0.5697  | -0.0196 | 0.0439  | 0.2261 | 0.2417 | -0.5309 | -0.5309 | Calca         |
| 0.5213  | -0.0771 | -0.0068 | 0.2913 | 0.2940 | -0.6296 | -0.3932 | Plaur         |
| 0.4660  | 0.0929  | -0.0749 | 0.3214 | 0.2786 | -0.5420 | -0.5420 | Sv2b          |
| 0.1855  | -0.0551 | 0.0152  | 0.4492 | 0.4547 | -0.4852 | -0.5642 | Ifitm1        |
| 0.1877  | -0.0549 | -0.0649 | 0.4934 | 0.4501 | -0.5057 | -0.5057 | Edil3         |
| 0.1896  | 0.0612  | 0.0589  | 0.3992 | 0.3990 | -0.6644 | -0.4437 | Fam20a        |
| 0.1232  | -0.0750 | -0.1854 | 0.5454 | 0.4920 | -0.4556 | -0.4446 | Podxl         |
| 0.2691  | -0.2535 | -0.0686 | 0.4666 | 0.4856 | -0.4686 | -0.4307 | Btnl9         |
| 0.3834  | -0.1700 | -0.1277 | 0.3530 | 0.4869 | -0.5570 | -0.3685 | Nqo1          |
| 0.3280  | -0.2113 | -0.3586 | 0.5132 | 0.4457 | -0.3586 | -0.3586 | Fam81a        |
| 0.4094  | -0.2448 | -0.3698 | 0.4645 | 0.4255 | -0.2963 | -0.3886 | Dsp           |
| 0.2838  | -0.3221 | -0.3221 | 0.5077 | 0.4967 | -0.3221 | -0.3221 | Eml1          |
| 0.2780  | -0.3072 | -0.3072 | 0.2593 | 0.6914 | -0.3072 | -0.3072 | Clec4d        |
| 0.4409  | 0.2308  | 0.2028  | 0.1497 | 0.1297 | -0.6334 | -0.5205 | Hs3st1        |
| 0.4776  | 0.2250  | 0.2065  | 0.1133 | 0.1191 | -0.5708 | -0.5708 | Klrg1         |
| 0.4367  | 0.2149  | 0.2107  | 0.1520 | 0.1467 | -0.5805 | -0.5805 | Ccr8          |
| 0.4201  | 0.2090  | 0.2137  | 0.1600 | 0.1647 | -0.5837 | -0.5837 | Il4           |
| 0.4367  | 0.2327  | 0.2170  | 0.1497 | 0.1221 | -0.5791 | -0.5791 | Fbxl21        |
| 0.4242  | 0.2319  | 0.2245  | 0.1497 | 0.1324 | -0.5814 | -0.5814 | Naip6         |
| 0.3976  | 0.1997  | 0.2105  | 0.1748 | 0.1840 | -0.6631 | -0.5036 | Fam46a        |

|        |        |        |         |         |         |         |               |
|--------|--------|--------|---------|---------|---------|---------|---------------|
| 0.4018 | 0.1894 | 0.2043 | 0.1831  | 0.1923  | -0.6359 | -0.5349 | Neurl3        |
| 0.4078 | 0.2028 | 0.1787 | 0.2077  | 0.1694  | -0.6477 | -0.5188 | Abcb1a        |
| 0.4143 | 0.2073 | 0.1957 | 0.1816  | 0.1657  | -0.6470 | -0.5177 | Myo1e         |
| 0.4159 | 0.1863 | 0.1519 | 0.2022  | 0.2023  | -0.6698 | -0.4888 | Il2rb         |
| 0.4306 | 0.1868 | 0.2082 | 0.1664  | 0.1525  | -0.6958 | -0.4487 | Lilrb4        |
| 0.4818 | 0.1201 | 0.1464 | 0.2059  | 0.1860  | -0.5209 | -0.6194 | Gp49a         |
| 0.4427 | 0.1764 | 0.1637 | 0.2056  | 0.1725  | -0.5705 | -0.5904 | Rora          |
| 0.4687 | 0.1745 | 0.1203 | 0.1770  | 0.2089  | -0.5747 | -0.5747 | 1700113H08Rik |
| 0.6257 | 0.1705 | 0.1634 | 0.0392  | 0.0488  | -0.5238 | -0.5238 | Csf2          |
| 0.5689 | 0.1764 | 0.1793 | 0.1055  | 0.0632  | -0.5468 | -0.5468 | Clnk          |
| 0.6369 | 0.0918 | 0.0639 | 0.1138  | 0.1414  | -0.5239 | -0.5239 | Il13          |
| 0.6970 | 0.0781 | 0.0609 | 0.0707  | 0.0845  | -0.5182 | -0.4730 | Tgm2          |
| 0.6953 | 0.0402 | 0.0443 | 0.0926  | 0.1181  | -0.4952 | -0.4952 | Klrb1b        |
| 0.4613 | 0.3035 | 0.3075 | -0.0244 | 0.0393  | -0.6042 | -0.4831 | Cxcl10        |
| 0.6073 | 0.2295 | 0.2460 | -0.0535 | -0.0150 | -0.5227 | -0.4916 | Ccr12         |
| 0.2632 | 0.3181 | 0.3217 | 0.1238  | 0.1254  | -0.4511 | -0.7011 | Gm4956        |
| 0.2702 | 0.3468 | 0.3214 | 0.1219  | 0.1039  | -0.5821 | -0.5821 | Art2b         |
| 0.2762 | 0.3369 | 0.3539 | 0.0831  | 0.1038  | -0.5495 | -0.6045 | Ffar2         |
| 0.2490 | 0.3628 | 0.3691 | 0.0724  | 0.0925  | -0.5729 | -0.5729 | Hpn           |
| 0.3144 | 0.2988 | 0.3328 | 0.1122  | 0.1058  | -0.5820 | -0.5820 | Pard3         |
| 0.3131 | 0.3406 | 0.3160 | 0.0948  | 0.0920  | -0.5782 | -0.5782 | Asb2          |
| 0.3359 | 0.3245 | 0.2981 | 0.1001  | 0.1013  | -0.5800 | -0.5800 | Serpina3f     |
| 0.3312 | 0.3002 | 0.2883 | 0.1215  | 0.1297  | -0.5854 | -0.5854 | Csf1          |
| 0.3829 | 0.2873 | 0.2778 | 0.1081  | 0.1027  | -0.5794 | -0.5794 | Ret           |
| 0.3897 | 0.3051 | 0.2789 | 0.1108  | 0.0652  | -0.5748 | -0.5748 | Art2a-ps      |
| 0.4132 | 0.3016 | 0.2857 | 0.0579  | 0.0792  | -0.5688 | -0.5688 | Sdc4          |
| 0.4175 | 0.2933 | 0.2576 | 0.0752  | 0.1028  | -0.5732 | -0.5732 | Il6           |
| 0.4006 | 0.2876 | 0.2716 | 0.0888  | 0.0977  | -0.5073 | -0.6390 | Gimap4        |
| 0.3762 | 0.2303 | 0.2058 | 0.1786  | 0.1503  | -0.4011 | -0.7401 | Adam19        |
| 0.4332 | 0.2026 | 0.1969 | 0.1503  | 0.1596  | -0.4454 | -0.6972 | Dkk3          |
| 0.4832 | 0.2619 | 0.2242 | 0.0791  | 0.0483  | -0.4113 | -0.6855 | Irak3         |
| 0.2573 | 0.3125 | 0.2975 | 0.1502  | 0.1641  | -0.5908 | -0.5908 | Serpina3g     |
| 0.2538 | 0.2850 | 0.2927 | 0.1657  | 0.1903  | -0.5937 | -0.5937 | 1810011H11Rik |
| 0.2483 | 0.2929 | 0.3046 | 0.1613  | 0.1778  | -0.5925 | -0.5925 | Cpne7         |
| 0.2516 | 0.3074 | 0.3179 | 0.1507  | 0.1496  | -0.6284 | -0.5488 | H2-Q6         |
| 0.2023 | 0.2990 | 0.3007 | 0.1822  | 0.2027  | -0.6119 | -0.5750 | Gimap3        |
| 0.2286 | 0.2921 | 0.3172 | 0.1645  | 0.1819  | -0.6062 | -0.5781 | Fam55d        |
| 0.2421 | 0.2746 | 0.2708 | 0.2003  | 0.2037  | -0.6187 | -0.5729 | Naip2         |
| 0.2376 | 0.2587 | 0.2778 | 0.2115  | 0.2066  | -0.6223 | -0.5699 | Mmp25         |
| 0.1580 | 0.2931 | 0.3101 | 0.2019  | 0.2178  | -0.6516 | -0.5293 | Acsbg1        |
| 0.1768 | 0.3332 | 0.3398 | 0.1660  | 0.1575  | -0.6156 | -0.5576 | H2-Q8         |

|        |        |        |        |        |         |         |               |
|--------|--------|--------|--------|--------|---------|---------|---------------|
| 0.2292 | 0.2571 | 0.2524 | 0.2304 | 0.2195 | -0.5237 | -0.6649 | Eif2s3y       |
| 0.2056 | 0.2519 | 0.2564 | 0.2261 | 0.2512 | -0.5461 | -0.6450 | Gm14303       |
| 0.2043 | 0.2736 | 0.2696 | 0.2106 | 0.2335 | -0.5648 | -0.6268 | Zbtb7b        |
| 0.2495 | 0.2358 | 0.2440 | 0.2209 | 0.2447 | -0.5975 | -0.5975 | Krt80         |
| 0.2272 | 0.2323 | 0.2369 | 0.2401 | 0.2581 | -0.6119 | -0.5827 | Ptgir         |
| 0.1491 | 0.2871 | 0.2755 | 0.2249 | 0.2513 | -0.5940 | -0.5940 | Alox5         |
| 0.1783 | 0.2707 | 0.2834 | 0.2273 | 0.2314 | -0.5863 | -0.6047 | Samhd1        |
| 0.1916 | 0.2805 | 0.2733 | 0.2211 | 0.2254 | -0.5959 | -0.5959 | Fam19a3       |
| 0.1895 | 0.3046 | 0.2770 | 0.2039 | 0.2141 | -0.5946 | -0.5946 | Metrn1        |
| 0.1879 | 0.2719 | 0.2659 | 0.2322 | 0.2338 | -0.6210 | -0.5707 | Tspan32       |
| 0.1875 | 0.2876 | 0.2816 | 0.2131 | 0.2200 | -0.6199 | -0.5698 | Gm5127        |
| 0.3410 | 0.2425 | 0.2225 | 0.1904 | 0.1895 | -0.5930 | -0.5930 | 1300014I06Rik |
| 0.3577 | 0.2668 | 0.2370 | 0.1670 | 0.1493 | -0.6088 | -0.5691 | Nmur1         |
| 0.3674 | 0.2172 | 0.2506 | 0.1734 | 0.1702 | -0.5636 | -0.6152 | Pde7b         |
| 0.3564 | 0.1985 | 0.2594 | 0.1691 | 0.1984 | -0.5909 | -0.5909 | Klrk1         |
| 0.2858 | 0.2652 | 0.2422 | 0.1977 | 0.2007 | -0.5958 | -0.5958 | Rnf128        |
| 0.2981 | 0.2335 | 0.2355 | 0.2144 | 0.2107 | -0.5961 | -0.5961 | Il18rap       |
| 0.2912 | 0.2709 | 0.2206 | 0.2131 | 0.1942 | -0.5635 | -0.6265 | Cntn1         |
| 0.3069 | 0.2529 | 0.2398 | 0.1902 | 0.1996 | -0.5728 | -0.6166 | Cxcr6         |
| 0.3084 | 0.2294 | 0.2659 | 0.1782 | 0.2066 | -0.5736 | -0.6149 | Slc7a8        |
| 0.3336 | 0.2156 | 0.2279 | 0.2038 | 0.2060 | -0.5621 | -0.6248 | Ddx3y         |
| 0.3715 | 0.2380 | 0.2223 | 0.1700 | 0.1667 | -0.4937 | -0.6749 | Epas1         |
| 0.3440 | 0.2562 | 0.2310 | 0.1803 | 0.1556 | -0.4722 | -0.6950 | Lpcat2        |
| 0.3886 | 0.2395 | 0.2242 | 0.1450 | 0.1720 | -0.5254 | -0.6440 | Arg1          |
| 0.3142 | 0.2621 | 0.2681 | 0.1693 | 0.1691 | -0.5471 | -0.6357 | Ttc39b        |
| 0.3299 | 0.2919 | 0.2381 | 0.1871 | 0.1281 | -0.5260 | -0.6490 | Pcsk1         |
| 0.2736 | 0.2613 | 0.2703 | 0.1759 | 0.1929 | -0.4722 | -0.7019 | Naip5         |
| 0.2300 | 0.2413 | 0.2454 | 0.2237 | 0.2300 | -0.4425 | -0.7280 | Nt5e          |
| 0.2556 | 0.2172 | 0.1977 | 0.2602 | 0.2509 | -0.4918 | -0.6898 | Gpr114        |
| 0.2510 | 0.2196 | 0.2305 | 0.2613 | 0.2271 | -0.5301 | -0.6594 | Nav2          |
| 0.2743 | 0.2274 | 0.2133 | 0.2436 | 0.2275 | -0.5123 | -0.6738 | Cd200r1       |
| 0.3068 | 0.2070 | 0.1779 | 0.2541 | 0.2353 | -0.5073 | -0.6738 | Jag1          |
| 0.3497 | 0.1908 | 0.1622 | 0.2490 | 0.2231 | -0.5066 | -0.6683 | Ahnak         |
| 0.2269 | 0.1275 | 0.1452 | 0.3365 | 0.3344 | -0.6057 | -0.5650 | Il18r1        |
| 0.2381 | 0.1380 | 0.1185 | 0.3489 | 0.3244 | -0.6097 | -0.5582 | Gzmb          |
| 0.3299 | 0.1222 | 0.1097 | 0.3004 | 0.3049 | -0.5835 | -0.5835 | Stab2         |
| 0.3542 | 0.1205 | 0.1418 | 0.2785 | 0.2757 | -0.6065 | -0.5643 | Ramp3         |
| 0.2814 | 0.1941 | 0.1756 | 0.2759 | 0.2624 | -0.5907 | -0.5987 | Hlf           |
| 0.3255 | 0.1886 | 0.1843 | 0.2489 | 0.2401 | -0.5937 | -0.5937 | Itga2         |
| 0.3582 | 0.1697 | 0.1671 | 0.2394 | 0.2460 | -0.6067 | -0.5737 | Icos          |
| 0.2457 | 0.2582 | 0.2421 | 0.2227 | 0.2199 | -0.6645 | -0.5243 | Fgl2          |

|         |        |        |        |        |         |         |               |
|---------|--------|--------|--------|--------|---------|---------|---------------|
| 0.2833  | 0.2401 | 0.2378 | 0.2157 | 0.2057 | -0.6846 | -0.4980 | Kdm5d         |
| 0.3258  | 0.2184 | 0.2306 | 0.2087 | 0.1938 | -0.6858 | -0.4915 | Uty           |
| 0.3266  | 0.2165 | 0.2004 | 0.2244 | 0.2071 | -0.6945 | -0.4804 | Cd226         |
| 0.0699  | 0.2841 | 0.2742 | 0.2608 | 0.2821 | -0.6401 | -0.5309 | Rpsa-ps10     |
| 0.1362  | 0.2769 | 0.2687 | 0.2408 | 0.2616 | -0.6427 | -0.5414 | Gm15500       |
| 0.1161  | 0.2858 | 0.2820 | 0.2525 | 0.2407 | -0.6618 | -0.5154 | Fam124b       |
| 0.0757  | 0.2225 | 0.1871 | 0.3300 | 0.3496 | -0.5825 | -0.5825 | S100a4        |
| 0.1409  | 0.2272 | 0.2364 | 0.2945 | 0.2869 | -0.6073 | -0.5786 | Rab27b        |
| 0.1999  | 0.2023 | 0.2341 | 0.2714 | 0.2840 | -0.5958 | -0.5958 | 9430031J16Rik |
| 0.1528  | 0.1214 | 0.2584 | 0.3160 | 0.3256 | -0.5871 | -0.5871 | Zbtb16        |
| -0.0809 | 0.2491 | 0.2616 | 0.3422 | 0.3467 | -0.5593 | -0.5593 | S1pr1         |
| 0.0167  | 0.2713 | 0.2670 | 0.2934 | 0.3109 | -0.5797 | -0.5797 | Rpl28-ps1     |
| -0.0401 | 0.2785 | 0.2860 | 0.2980 | 0.3117 | -0.6380 | -0.4961 | Rarg          |
| 0.0638  | 0.2847 | 0.2832 | 0.2503 | 0.2713 | -0.4472 | -0.7060 | Gm13654       |
| 0.0194  | 0.3092 | 0.3334 | 0.2260 | 0.2589 | -0.4807 | -0.6661 | Ltb4r1        |
| 0.1126  | 0.2798 | 0.2767 | 0.2572 | 0.2570 | -0.5917 | -0.5917 | Il1rl1        |
| 0.0776  | 0.2784 | 0.2820 | 0.2623 | 0.2759 | -0.5765 | -0.5997 | Tnfrsf25      |
| 0.0992  | 0.3084 | 0.2686 | 0.2577 | 0.2429 | -0.5371 | -0.6396 | Tlr1          |
| 0.0833  | 0.2723 | 0.2744 | 0.2618 | 0.2826 | -0.5352 | -0.6393 | Rps25-ps1     |
| 0.1435  | 0.3244 | 0.3335 | 0.1885 | 0.1857 | -0.5563 | -0.6193 | Gvin1         |
| 0.1064  | 0.3470 | 0.3412 | 0.1866 | 0.1865 | -0.5714 | -0.5964 | Grin2d        |
| 0.1247  | 0.3345 | 0.3406 | 0.1824 | 0.1817 | -0.5019 | -0.6621 | Gm4070        |
| -0.6358 | 0.3335 | 0.3195 | 0.2932 | 0.3144 | -0.3479 | -0.2769 | Gm11361       |
| -0.6136 | 0.3311 | 0.3274 | 0.2997 | 0.3150 | -0.3260 | -0.3337 | Gm5045        |
| -0.5881 | 0.3207 | 0.3282 | 0.3162 | 0.3180 | -0.3241 | -0.3708 | Id1           |
| -0.6026 | 0.3250 | 0.3301 | 0.2916 | 0.3288 | -0.3001 | -0.3729 | Gm10709       |
| -0.6861 | 0.2604 | 0.2726 | 0.3528 | 0.3411 | -0.2741 | -0.2668 | Elovl7        |
| -0.6634 | 0.3284 | 0.3113 | 0.2914 | 0.3158 | -0.2818 | -0.3018 | Gm6274        |
| -0.6931 | 0.3264 | 0.3338 | 0.2701 | 0.2937 | -0.2384 | -0.2926 | Gm5148        |
| -0.4650 | 0.3698 | 0.3512 | 0.3003 | 0.2808 | -0.3721 | -0.4650 | St8sia6       |
| -0.4657 | 0.3970 | 0.4032 | 0.2440 | 0.2438 | -0.3565 | -0.4657 | Apol9b        |
| -0.4986 | 0.3356 | 0.3321 | 0.3062 | 0.3261 | -0.3410 | -0.4605 | Gm7536        |
| -0.4677 | 0.3472 | 0.3390 | 0.2952 | 0.3225 | -0.3686 | -0.4677 | Gm12191       |
| -0.4731 | 0.3368 | 0.3390 | 0.2962 | 0.3335 | -0.3822 | -0.4503 | Gm10119       |
| -0.4736 | 0.3144 | 0.3205 | 0.3146 | 0.3494 | -0.3338 | -0.4915 | Gm10736       |
| -0.5052 | 0.3370 | 0.3441 | 0.2781 | 0.3248 | -0.2735 | -0.5052 | Gm13611       |
| -0.5383 | 0.3311 | 0.3261 | 0.3082 | 0.3314 | -0.3507 | -0.4078 | Gm5428        |
| -0.5313 | 0.3412 | 0.3360 | 0.2957 | 0.3237 | -0.4236 | -0.3417 | Gm13268       |
| -0.4579 | 0.3381 | 0.3293 | 0.3110 | 0.3300 | -0.4134 | -0.4371 | Gm13436       |
| -0.4361 | 0.3396 | 0.3471 | 0.2981 | 0.3236 | -0.4361 | -0.4361 | Gm12918       |
| -0.4364 | 0.3268 | 0.3174 | 0.3362 | 0.3287 | -0.4364 | -0.4364 | 5430421N21Rik |

|         |        |        |         |         |         |         |               |
|---------|--------|--------|---------|---------|---------|---------|---------------|
| -0.4361 | 0.3065 | 0.3150 | 0.3303  | 0.3565  | -0.4361 | -0.4361 | Gm10116       |
| -0.4359 | 0.3064 | 0.2977 | 0.3479  | 0.3557  | -0.4359 | -0.4359 | Gm10241       |
| -0.4251 | 0.2126 | 0.2007 | 0.4129  | 0.4492  | -0.4251 | -0.4251 | Ggt1          |
| -0.4342 | 0.2949 | 0.2589 | 0.3630  | 0.3856  | -0.4342 | -0.4342 | Al646023      |
| -0.4314 | 0.2537 | 0.2445 | 0.3780  | 0.4180  | -0.4314 | -0.4314 | Spon2         |
| -0.3677 | 0.3239 | 0.3290 | 0.3064  | 0.3293  | -0.5731 | -0.3477 | Gm8430        |
| -0.2017 | 0.3278 | 0.3188 | 0.2971  | 0.3175  | -0.5297 | -0.5297 | Rps27a-ps2    |
| -0.2919 | 0.3442 | 0.3346 | 0.3015  | 0.3093  | -0.4989 | -0.4989 | Rpl9-ps4      |
| -0.4870 | 0.5179 | 0.5514 | -0.0701 | -0.0001 | -0.0909 | -0.4212 | Fscn1         |
| -0.4088 | 0.5673 | 0.5526 | -0.0354 | -0.0433 | -0.2804 | -0.3520 | Gm4841        |
| -0.3979 | 0.5830 | 0.5352 | -0.0084 | -0.0952 | -0.2187 | -0.3979 | Gm5970        |
| -0.6080 | 0.4849 | 0.4918 | 0.0274  | 0.1247  | -0.2873 | -0.2334 | Ifit3         |
| -0.5554 | 0.5243 | 0.5084 | 0.0562  | 0.0145  | -0.3224 | -0.2256 | Gm4951        |
| -0.5893 | 0.5039 | 0.5245 | -0.0102 | 0.0551  | -0.2830 | -0.2011 | I830012O16Rik |
| -0.5960 | 0.5161 | 0.5240 | -0.0127 | 0.0191  | -0.2544 | -0.1961 | Ifi44         |
| -0.4696 | 0.4955 | 0.4825 | 0.0872  | 0.1172  | -0.4696 | -0.2434 | Ms4a4c        |
| -0.4982 | 0.4911 | 0.5059 | 0.0896  | 0.0956  | -0.3850 | -0.2989 | Slfn1         |
| -0.6663 | 0.3964 | 0.4193 | 0.1788  | 0.2122  | -0.2643 | -0.2762 | Pydc3         |
| -0.6989 | 0.4368 | 0.4621 | 0.0787  | 0.1293  | -0.1806 | -0.2273 | Tlr7          |
| -0.7469 | 0.4577 | 0.4664 | -0.0697 | 0.0281  | -0.0798 | -0.0558 | Gm14446       |
| -0.8407 | 0.3459 | 0.3395 | 0.1384  | 0.1621  | -0.0379 | -0.1073 | Ly6c1         |
| -0.1229 | 0.5597 | 0.5354 | -0.0444 | -0.0687 | -0.3614 | -0.4977 | F830016B08Rik |
| 0.1025  | 0.5190 | 0.5192 | -0.1364 | -0.0872 | -0.4153 | -0.5018 | Gbp10         |
| 0.1623  | 0.5275 | 0.5550 | -0.3112 | -0.3112 | -0.3112 | -0.3112 | Apol7c        |
| 0.0369  | 0.5753 | 0.5492 | -0.3394 | -0.3394 | -0.1433 | -0.3394 | Aldh1a2       |
| -0.0176 | 0.5639 | 0.5713 | -0.0996 | -0.3393 | -0.3393 | -0.3393 | Vmn2r100      |
| -0.2675 | 0.5409 | 0.6396 | -0.1105 | -0.2675 | -0.2675 | -0.2675 | Clu           |
| -0.2781 | 0.5749 | 0.6124 | -0.1873 | -0.1657 | -0.2781 | -0.2781 | Klra14        |
| -0.2386 | 0.6410 | 0.5519 | -0.2386 | -0.2386 | -0.2386 | -0.2386 | Anxa3         |
| -0.2389 | 0.5687 | 0.6255 | -0.2389 | -0.2389 | -0.2389 | -0.2389 | Gm8221        |
| -0.2388 | 0.5684 | 0.6259 | -0.2388 | -0.2388 | -0.2388 | -0.2388 | Zfp366        |
| -0.2390 | 0.5928 | 0.6024 | -0.2390 | -0.2390 | -0.2390 | -0.2390 | Lyz1          |
| -0.2331 | 0.4253 | 0.7400 | -0.2331 | -0.2331 | -0.2331 | -0.2331 | Cd209b        |
| 0.5345  | 0.3458 | 0.4050 | -0.3873 | -0.2656 | -0.2452 | -0.3873 | Ccl22         |
| 0.5224  | 0.3849 | 0.3906 | -0.3181 | -0.3470 | -0.3637 | -0.2692 | Dgat2         |
| 0.5150  | 0.3705 | 0.3614 | -0.1966 | -0.1491 | -0.4506 | -0.4506 | Cybb          |
| 0.3815  | 0.5408 | 0.3444 | -0.2676 | -0.1784 | -0.4497 | -0.3711 | Cyp26b1       |
| 0.7509  | 0.2120 | 0.2010 | -0.3391 | -0.3391 | -0.2058 | -0.2801 | Ahrr          |
| 0.7005  | 0.2774 | 0.2316 | -0.2386 | -0.2975 | -0.2797 | -0.3938 | Atp8a2        |
| 0.8038  | 0.1909 | 0.0781 | -0.2860 | -0.3536 | -0.2894 | -0.1439 | Ppfibp2       |
| 0.4294  | 0.4628 | 0.2500 | -0.1762 | -0.6633 | -0.0462 | -0.2566 | Ceacam15      |

|         |        |        |         |         |         |         |         |
|---------|--------|--------|---------|---------|---------|---------|---------|
| -0.1808 | 0.4432 | 0.3482 | -0.4698 | -0.5663 | 0.3067  | 0.1189  | Gbp11   |
| -0.4263 | 0.3477 | 0.3104 | -0.4263 | -0.4195 | 0.4726  | 0.1414  | Dnahc2  |
| -0.1121 | 0.3904 | 0.1626 | -0.2991 | -0.6375 | 0.5559  | -0.0602 | Gm12194 |
| -0.4548 | 0.2581 | 0.1787 | -0.3542 | -0.4548 | 0.3129  | 0.5142  | Akap2   |
| -0.4585 | 0.4588 | 0.4745 | -0.2721 | -0.4585 | -0.0081 | 0.2639  | Lad1    |
| -0.4696 | 0.4803 | 0.4063 | -0.2673 | -0.4630 | 0.3129  | 0.0004  | Lama4   |
| -0.4469 | 0.4339 | 0.5917 | -0.2097 | -0.4469 | 0.1261  | -0.0483 | Gm16340 |
| -0.4462 | 0.4168 | 0.6050 | -0.2090 | -0.4462 | 0.1271  | -0.0474 | Ttc39a  |
| 0.0087  | 0.2248 | 0.2459 | -0.5908 | -0.5605 | 0.3300  | 0.3419  | Pou6f1  |
| 0.2755  | 0.1192 | 0.1961 | -0.6592 | -0.5115 | 0.3500  | 0.2299  | Tlr9    |
